# Supplementary material for: Synthesis of new hybrid sorbent 2-mercaptobenzaldehyde SBA-15 and its application in solid phase extraction of Cd(ii) from water and food samples
Source: Royal Society of Chemistry journal article supplement (doi:10.1039/c5ay03031e), 2016-01-01
Supplement: c5ay03031e1.pdf [file c5ay03031e1.pdf]

## Electronic Supplementary Information

### Synthesis of new hybrid sorbent 2-mercaptobenzaldehyde SBA-15 and its application in solid phase extraction of Cd(II) from water and food samples

B. Sreenu<sup>a</sup>, K. Imran<sup>a</sup>, K. Seshaiyah<sup>\*a</sup>, Priti Sharma<sup>b</sup>, and A. P. Singh<sup>b</sup>

<sup>a</sup>Inorganic and Analytical Division, Department of Chemistry, Sri Venkateswara University, Tirupati, A.P-517502, India.

<sup>b</sup>Catalysis Division, National Chemical Laboratory, Pune.

\* Corresponding authors. Tel: +91877- 2289303. Email :[seshaiyahsvu@gmail.com](mailto:seshaiyahsvu@gmail.com)

## S1 Determination of Cd(II) in water and vegetable samples

### S 1.1 Collection and Preparation of water samples

The natural water samples were collected from two different places in Tirupati (A.P, India) in polyethylene bottles. The water samples were filtered through a 0.45µm cellulose membrane filter, spiked with known concentrations of Cd(II) and acidified to a pH of about 2.0 with concentrated HNO<sub>3</sub> and kept aside for overnight. 500ml of stored water sample was taken and pH was adjusted to 6.0 with 1:1 HCl or 1:1 ammonia followed by 2ml of acetate buffer and followed the procedure described in section 2.6 for determination of Cd concentration in each sample.

### S 1.2 Collection of food samples

The vegetable samples namely, onion (*Alium cepa*), Lady's Finger (*Abelmoschus esculentus*), cucumber (*Cucumis sativus*) and tomato (*Solanum lycopersicum*) were collected in polyethylene bags from the nearby agricultural fields of Tirupati.

### S 1.3 Sample preparation

The following procedure was used for food sample preparation. First, the collected vegetable samples were air dried for 5 days, then cleaned with double-distilled water followed by drying at 100 °C in a hot air oven for 3 h and then powdered. In second step, one gram of each sample was taken in PTFE digestion vessel, spiked with known concentrations

of Cd(II), homogenised and allowed for 24 h , and 5mL of concentrated nitric acid was added to each flask. After allowing for 10 h, the samples were digested in a microwave system for 10 min at 105 °C. A clear solution was obtained. The digested samples were further made up to 25 mL using double-distilled water and determined as described in section 2.5.

**Table S1.a)** Effect of the flow rates in the Cd(II) recovery.

| Flow rate (mL/min) | % Recovery of Cd (II) <sup>a</sup> |
|--------------------|------------------------------------|
| 0.5                | 94.3±2.5                           |
| 1.5                | 95.2±4.8                           |
| 2.0                | 94.8±3.1                           |
| 2.5                | 95.7±3.5                           |
| 3.0                | 95.1±4.2                           |
| 3.5                | 94.8±3.4                           |
| 4.0                | 94.2±3.8                           |

b) Effect of eluent flow rate on recovery of Cd(II)

| Flow rate (mL/min) | % Recovery of Cd (II) <sup>a</sup> |
|--------------------|------------------------------------|
| 0.2                | 94.1±3.4                           |
| 0.4                | 95.4±2.6                           |
| 0.6                | 94.6±2.8                           |
| 0.8                | 92.1±3.8                           |
| 1.0                | 91.5±3.1                           |

<sup>a</sup> Average of four determinations±standard deviation.

**Table S2.** Effect of interfering ions on determination of Cd(II)

| Foreign ions              | Tolerance limit $\mu\text{g L}^{-1}$ | Recovery (%)   |
|---------------------------|--------------------------------------|----------------|
| $\text{Li}^+$             | 1600                                 | 94.2 $\pm$ 1.0 |
| $\text{Na}^+$             | 2100                                 | 93.8 $\pm$ 1.0 |
| $\text{K}^+$              | 1600                                 | 93.6 $\pm$ 2.0 |
| $\text{Mg}^{+2}$          | 1100                                 | 93.7 $\pm$ 0.9 |
| $\text{Ca}^{+2}$          | 1100                                 | 93.4 $\pm$ 1.0 |
| $\text{Al}^{+3}$          | 1800                                 | 94.0 $\pm$ 2.0 |
| $\text{Fe}^{+3}$          | 600                                  | 92.9 $\pm$ 1.0 |
| $\text{Zn}^{+2}$          | 450                                  | 92.5 $\pm$ 0.8 |
| $\text{Cr}^{+3}$          | 600                                  | 92.6 $\pm$ 0.7 |
| $\text{Cu}^{+2}$          | 350                                  | 93.0 $\pm$ 0.6 |
| $\text{Ni}^{+2}$          | 350                                  | 93.0 $\pm$ 1.0 |
| $\text{Mn}^{2+}$          | 150                                  | 92.6 $\pm$ 0.7 |
| $\text{CH}_3\text{COO}^-$ | 100                                  | 93.1 $\pm$ 2.0 |
| $\text{HCOO}^-$           | 100                                  | 93.6 $\pm$ 1.0 |
| $\text{Cl}^-$             | 600                                  | 94.0 $\pm$ 1.0 |
| $\text{SO}_4^{-2}$        | 500                                  | 93.5 $\pm$ 0.5 |
| $\text{NO}_3^-$           | 400                                  | 94.2 $\pm$ 0.7 |
| $\text{CO}_3^{-2}$        | 500                                  | 94.0 $\pm$ 0.8 |
| $\text{PO}_4^{-2}$        | 200                                  | 93.5 $\pm$ 1.0 |

**Table S3.** Percentage of recovery of Cd(II) ions from the functionalized SBA-15 using different eluents.

| Eluent Solution         | Volume (mL) | % Recovery of Cd(II) (RSD) |
|-------------------------|-------------|----------------------------|
| CH <sub>3</sub> COOH(M) | 5           | 62.2 (0.8)                 |
| CH <sub>3</sub> COOH(M) | 15          | 66.5 (0.5)                 |
| CH <sub>3</sub> COOH(M) | 25          | 73.9 (1.2)                 |
| HCl(M)                  | 5           | 62.8 (1.0)                 |
| HCl(M)                  | 15          | 69.5 (0.6)                 |
| HCl(M)                  | 25          | 75.9 (0.9)                 |
| HNO <sub>3</sub> (M)    | 5           | 95.2 (1.0)                 |
| HNO <sub>3</sub> (M)    | 15          | 95.6 (0.8)                 |
| HNO <sub>3</sub> (M)    | 25          | 95.8 (1.3)                 |

**Table S4.** Comparison of determination of Cd(II) by AAS method and ICPAES method

| Vegetables samples(A. cepa (onion)) |        |                                |                                    |
|-------------------------------------|--------|--------------------------------|------------------------------------|
| S. No.                              | Spiked | AAS method( $\mu\text{g/kg}$ ) | ICPAES method ( $\mu\text{g/kg}$ ) |
| 1                                   | 0      | 0.021                          | .....                              |
| 2                                   | 5      | 5.01 $\pm$ 0.6                 | 5.025 $\pm$ 0.9                    |
| 3                                   | 10     | 9.73 $\pm$ 0.2                 | 9.25 $\pm$ 0.7                     |
| 4                                   | 15     | 14.58 $\pm$ 0.1                | 14.78 $\pm$ 0.5                    |

**Table S5.** Determination of Cd(II) in water and vegetable samples.

| Sample                        | Spiked<br>( $\mu\text{g/L}$ )  | Found<br>( $\mu\text{g/L}$ )  | Recovery<br>(%) |
|-------------------------------|--------------------------------|-------------------------------|-----------------|
| Water Sample.1                | 0.0                            | 0.95 $\pm$ 0.4                | -               |
|                               | 5.0                            | 5.56 $\pm$ 0.2                | 93.44           |
|                               | 10.0                           | 10.20 $\pm$ 0.3               | 93.15           |
|                               | 15.0                           | 15.09 $\pm$ 0.1               | 94.60           |
| Water Sample.2                | 0.0                            | 0.92 $\pm$ 0.2                | -               |
|                               | 5.0                            | 5.55 $\pm$ 0.4                | 93.75           |
|                               | 10.0                           | 10.10 $\pm$ 0.3               | 92.49           |
|                               | 15.0                           | 15.04 $\pm$ 0.6               | 93.47           |
| Vegetables                    | Spiked<br>( $\mu\text{g/Kg}$ ) | Found<br>( $\mu\text{g/Kg}$ ) | Recovery<br>(%) |
| A. cepa (onion)               | 0.0                            | 0.87 $\pm$ 0.3                | -               |
|                               | 5.0                            | 5.45 $\pm$ 0.2                | 92.84           |
|                               | 10.0                           | 10.2 $\pm$ 0.1                | 93.83           |
|                               | 15.0                           | 15.01 $\pm$ 0.4               | 94.58           |
| A. esculentus (Lady's Finger) | 0.0                            | 0.89 $\pm$ 0.2                | -               |
|                               | 5.0                            | 5.42 $\pm$ 0.1                | 92.02           |
|                               | 10.0                           | 10.15 $\pm$ 0.3               | 93.20           |
|                               | 15.0                           | 15.01 $\pm$ 0.2               | 94.46           |
| C. sativus (cucumber)         | 0.0                            | 0.96 $\pm$ 0.6                | -               |
|                               | 5.0                            | 5.57 $\pm$ 0.3                | 93.29           |
|                               | 10.0                           | 10.16 $\pm$ 0.1               | 92.70           |
|                               | 15.0                           | 15.02 $\pm$ 0.1               | 94.11           |
| L. esculentum (tomato)        | 0.0                            | 0.94 $\pm$ 0.2                | -               |
|                               | 5.0                            | 5.49 $\pm$ 0.3                | 92.73           |
|                               | 10.0                           | 10.18 $\pm$ 0.1               | 93.31           |
|                               | 15.0                           | 15.02 $\pm$ 0.3               | 94.22           |
